# Supplementary material for: Multi-perspective comparison of the immune microenvironment of primary colorectal cancer and liver metastases
Source: Springer Nature journal article supplement (doi:10.1186/s12967-022-03667-2), 2022-10-04
Supplement: MOESM1 [file 23570010]

## Supplementary Material

### 1 Supplementary Figures and Tables

#### 1.1 Supplementary Figures

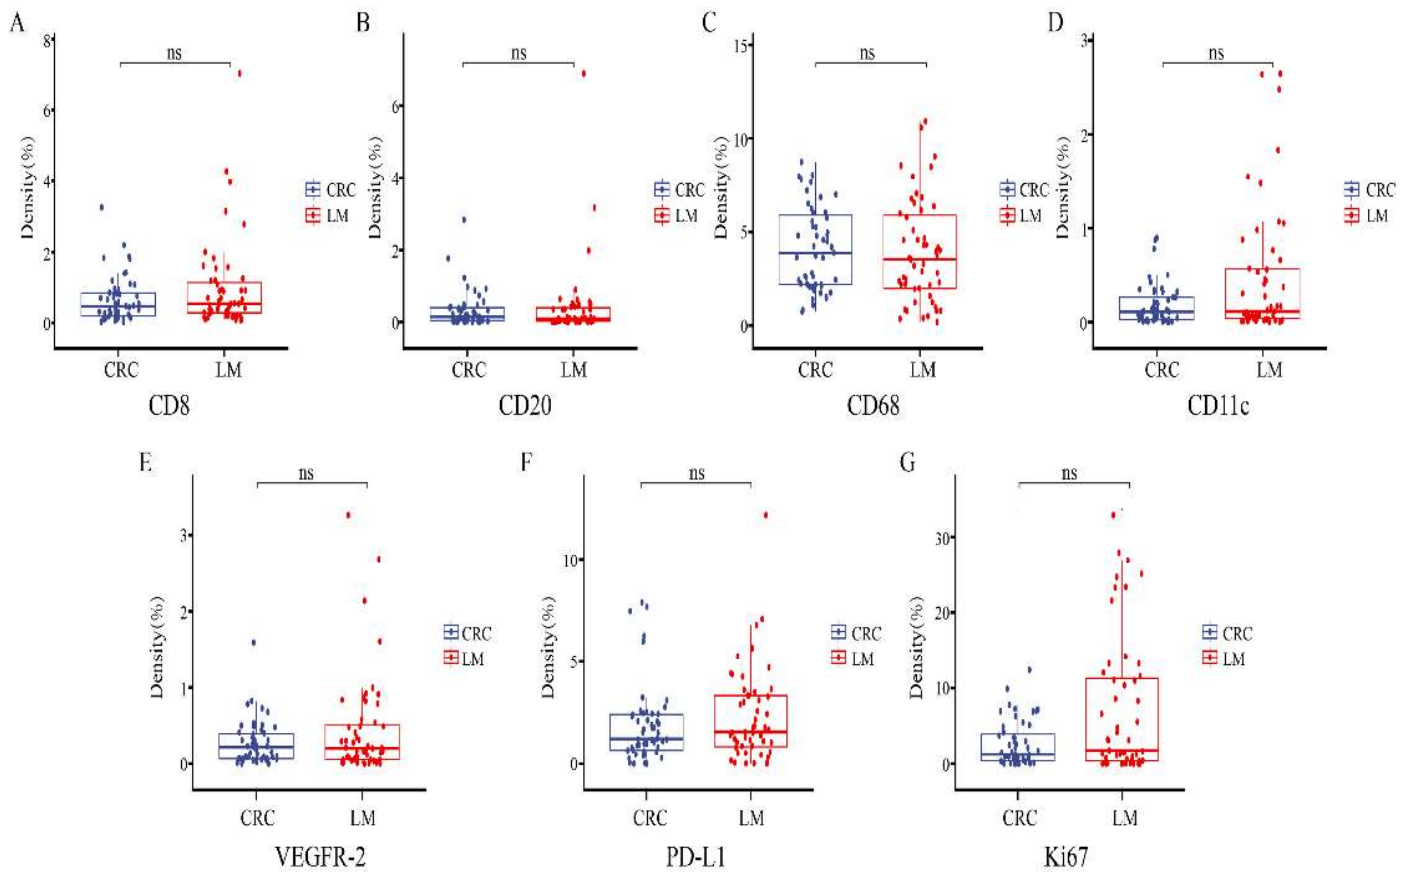

**Additional file 1: Figure S1** General comparison of immune markers between primary tumors and liver metastases (A: CD8, B: CD20, C: CD68, D: CD11c, E: VEGFR-2, F: PD-L1, G: Ki67) ( $p \geq 0.05$ , not significant)
