# Supplementary material for: Multi-perspective comparison of the immune microenvironment of primary colorectal cancer and liver metastases
Source: Springer Nature journal article supplement (doi:10.1186/s12967-022-03667-2), 2022-10-04
Supplement: MOESM2 [file 23570010]

## 1.2 Supplementary Tables

**Additional file 2: Table S1** General comparison of immune markers between primary tumors and liver metastases

|               | Primary tumor |        |           | Liver metastases |        |            | <i>p</i> value   |
|---------------|---------------|--------|-----------|------------------|--------|------------|------------------|
|               | Mean±SD       | Median | 25%, 75%  | Mean±SD          | Median | 25%, 75%   |                  |
| CD8           | 0.66±0.65     | 0.47   | 0.19 0.85 | 0.99±1.27        | 0.54   | 0.28 1.18  | 0.210            |
| CD68          | 4.24±2.57     | 3.89   | 2.17 6.03 | 3.91±2.76        | 3.54   | 1.94 5.99  | 0.416            |
| PD-L1         | 1.92±1.93     | 1.24   | 0.67 2.44 | 2.35±2.26        | 1.58   | 0.82 3.35  | 0.286            |
| Ki67          | 2.67±2.96     | 1.28   | 0.41 4.19 | 7.18±9.21        | 1.81   | 0.36 11.56 | 0.136            |
| Foxp3         | 0.38±0.56     | 0.15   | 0.07 0.36 | 0.58±0.52        | 0.47   | 0.18 0.73  | <b>&lt;0.001</b> |
| CD163         | 1.72±1.02     | 1.56   | 0.90 2.28 | 2.72±2.41        | 2.06   | 1.11 3.53  | <b>0.025</b>     |
| INF- $\gamma$ | 0.18±0.39     | 0.02   | 0.00 0.11 | 0.34±0.61        | 0.07   | 0.01 0.40  | <b>0.030</b>     |
| CD20          | 0.33±0.50     | 0.15   | 0.04 0.40 | 0.41±1.07        | 0.09   | 0.03 0.42  | 0.292            |
| CD66b         | 4.16±2.77     | 3.79   | 1.38 6.39 | 2.68±2.17        | 1.66   | 1.30 3.94  | <b>0.008</b>     |
| CD56          | 2.06±1.43     | 1.83   | 0.77 3.25 | 0.90±1.25        | 0.46   | 0.19 1.03  | <b>&lt;0.001</b> |
| VEGFR-2       | 0.27±0.29     | 0.22   | 0.07 0.40 | 0.45±0.67        | 0.21   | 0.05 0.54  | 0.647            |
| CD11c         | 0.18±0.22     | 0.11   | 0.02 0.27 | 0.46±0.69        | 0.11   | 0.04 0.57  | 0.159            |

*p* values were obtained from Wilcoxon's signed rank test

The bold values indicates significance at  $p < 0.05$
