# Supplementary material for: Multi-perspective comparison of the immune microenvironment of primary colorectal cancer and liver metastases
Source: Springer Nature journal article supplement (doi:10.1186/s12967-022-03667-2), 2022-10-04
Supplement: MOESM3 [file 23570010]

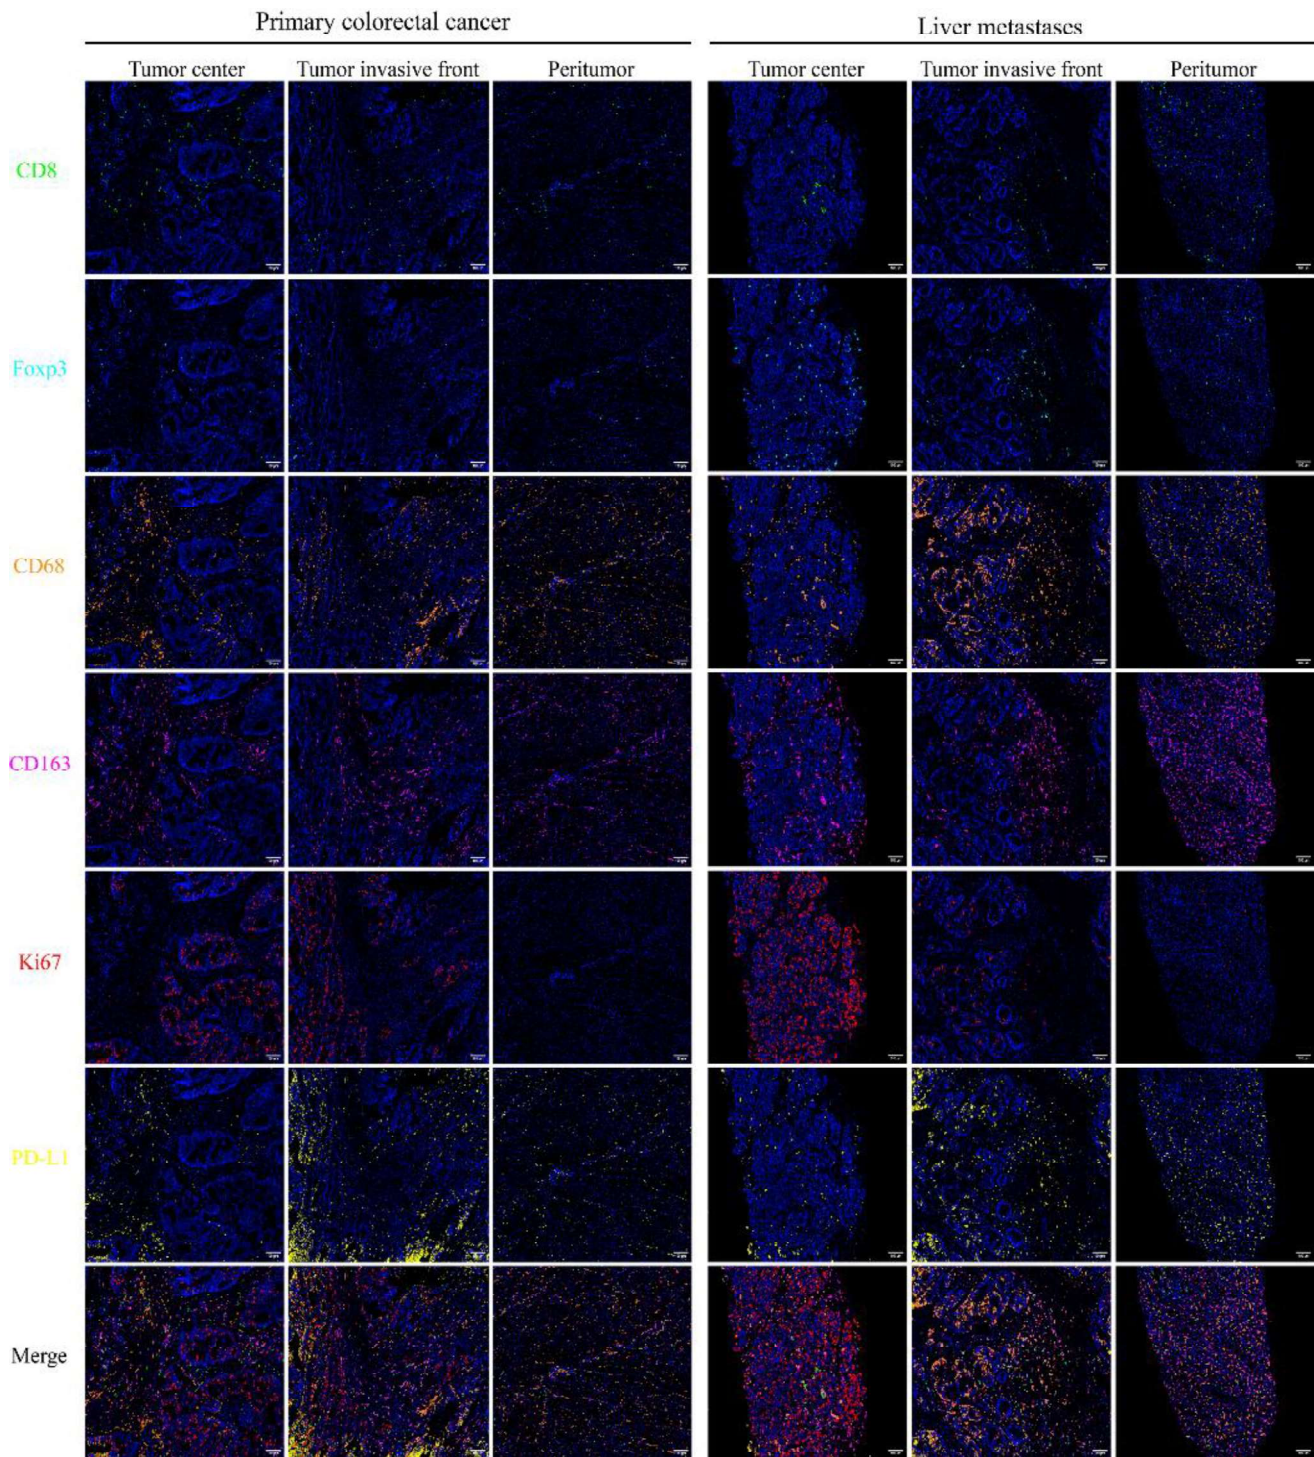

**Additional file 3: Figure S2** Representative multiplex immunofluorescence images of 6 cell markers from panel 1 in the tumor center (TC), tumor invasive front (TF), and peritumoral (PT) regions of primary tumors and liver metastases
