# Supplementary material for: Multi-perspective comparison of the immune microenvironment of primary colorectal cancer and liver metastases
Source: Springer Nature journal article supplement (doi:10.1186/s12967-022-03667-2), 2022-10-04
Supplement: MOESM5 [file 23570010]

**Additional file 5: Table S2** Comparison of the immune markers of the TC, TF and PT regions

|                  | Tumor Center |        |            | Tumor Front |        |           | Peritumor |             |           | <i>p</i> value |                |  |
|------------------|--------------|--------|------------|-------------|--------|-----------|-----------|-------------|-----------|----------------|----------------|--|
|                  | Mean±SD      | Median | 25%, 75%   | Mean±SD     | Median | 25%, 75%  | Mean±SD   | Median      | 25%, 75%  | TC:TF          | TF:PT          |  |
| Primary tumor    |              |        |            |             |        |           |           |             |           |                |                |  |
| CD8              | 0.25±0.38    | 0.09   | 0.03 0.31  | 1.36±1.95   | 0.81   | 0.34 1.53 | 0.19±0.31 | 0.06        | 0.02 0.26 | < <b>0.001</b> | < <b>0.001</b> |  |
| CD68             | 2.29±1.83    | 1.87   | 0.86 3.31  | 6.74±4.39   | 6.06   | 2.92 8.73 | 2.17±1.88 | 1.66        | 0.82 3.09 | < <b>0.001</b> | < <b>0.001</b> |  |
| PD-L1            | 1.05±1.38    | 0.58   | 0.20 1.35  | 3.01±2.88   | 2.22   | 0.91 3.90 | 0.76±0.93 | 0.36        | 0.05 1.19 | < <b>0.001</b> | < <b>0.001</b> |  |
| Ki67             | 4.37±5.05    | 2.04   | 0.62 6.59  | 0.57±0.71   | 0.29   | 0.07 0.90 | 0.08±0.19 | 0.01        | 0.00 0.06 | < <b>0.001</b> | < <b>0.001</b> |  |
| Foxp3            | 0.32±0.71    | 0.04   | 0.01 0.22  | 0.51±0.75   | 0.25   | 0.10 0.58 | 0.15±0.21 | 0.06        | 0.02 0.18 | < <b>0.001</b> | < <b>0.001</b> |  |
| CD163            | 0.56±0.69    | 0.32   | 0.10 0.70  | 3.38±2.01   | 2.94   | 2.08 4.40 | 1.82±1.46 | 1.63        | 0.49 2.81 | < <b>0.001</b> | < <b>0.001</b> |  |
| INF-γ            | 0.07±0.13    | 0.01   | 0.00 0.10  | 0.25±0.59   | 0.00   | 0.00 0.06 | 0.04±0.13 | 0.00        | 0.00 0.00 | 0.488          | <b>0.003</b>   |  |
| CD20             | 0.07±0.14    | 0.01   | 0.00 0.10  | 0.69±0.93   | 0.33   | 0.07 0.75 | 0.29±0.47 | 0.12        | 0.02 0.26 | < <b>0.001</b> | <b>0.002</b>   |  |
| CD66b            | 6.83±5.34    | 6.00   | 1.75 11.11 | 1.60±1.88   | 1.00   | 0.24 2.10 | 0.10±1.76 | 0.10        | 0.03 1.11 | < <b>0.001</b> | < <b>0.001</b> |  |
| CD56             | 2.91±2.61    | 2.50   | 0.83 4.15  | 1.00±1.28   | 0.44   | 0.17 1.32 | 0.32±0.91 | 0.06        | 0.00 0.23 | < <b>0.001</b> | < <b>0.001</b> |  |
| VEGFR-2          | 0.08±0.13    | 0.04   | 0.00 0.09  | 0.54±0.58   | 0.33   | 0.11 0.74 | 0.15±0.28 | 0.04        | 0.00 0.22 | < <b>0.001</b> | < <b>0.001</b> |  |
| CD11c            | 0.05±0.11    | 0.00   | 0.00 0.07  | 0.32±0.34   | 0.23   | 0.05 0.44 | 0.15±0.26 | 0.01        | 0.00 0.14 | < <b>0.001</b> | < <b>0.001</b> |  |
| Liver metastases |              |        |            |             |        |           |           |             |           |                |                |  |
| CD8              | 0.67±0.97    | 0.27   | 0.05 1.01  | 1.47±1.67   | 0.87   | 0.38 1.84 | 0.47±0.42 | <b>0.44</b> | 0.08 0.60 | < <b>0.001</b> | < <b>0.001</b> |  |
| CD68             | 2.77±2.49    | 1.80   | 1.13 3.78  | 5.43±4.40   | 4.07   | 2.52 7.88 | 2.87±2.22 | <b>2.32</b> | 1.32 4.94 | < <b>0.001</b> | <b>0.002</b>   |  |
| PD-L1            | 1.62±1.56    | 1.06   | 0.37 2.77  | 3.04±3.34   | 1.82   | 0.82 4.59 | 2.76±2.36 | <b>2.20</b> | 1.16 5.10 | <b>0.021</b>   | 0.716          |  |
| Ki67             | 11.05±14.80  | 2.02   | 0.08 19.70 | 1.99±5.82   | 0.36   | 0.07 1.86 | 1.44±6.89 | <b>0.13</b> | 0.04 0.45 | <b>0.006</b>   | <b>0.008</b>   |  |
| Foxp3            | 0.39±0.57    | 0.17   | 0.03 0.49  | 0.86±0.87   | 0.53   | 0.12 1.46 | 1.03±1.28 | <b>0.40</b> | 0.14 1.73 | < <b>0.001</b> | 0.682          |  |
| CD163            | 1.25±1.80    | 0.65   | 0.31 1.45  | 4.70±4.31   | 3.24   | 1.84 5.72 | 6.02±3.49 | <b>6.29</b> | 2.99 8.02 | < <b>0.001</b> | <b>0.010</b>   |  |
| INF-γ            | 0.48±0.92    | 0.02   | 0.00 0.64  | 0.22±0.43   | 0.05   | 0.02 0.30 | 0.40±0.84 | <b>0.03</b> | 0.00 0.44 | 0.795          | 0.605          |  |
| CD20             | 0.22±1.21    | 0.00   | 0.00 0.06  | 0.56±1.07   | 0.18   | 0.04 0.74 | 0.61±0.98 | <b>0.26</b> | 0.08 0.80 | < <b>0.001</b> | 0.370          |  |
| CD66b            | 3.93±2.94    | 3.76   | 1.74 5.77  | 1.41±2.21   | 0.65   | 0.35 1.72 | 0.25±0.34 | <b>0.11</b> | 0.07 0.36 | < <b>0.001</b> | < <b>0.001</b> |  |
| CD56             | 1.40±1.85    | 0.67   | 0.03 2.02  | 0.52±0.70   | 0.30   | 0.16 0.69 | 0.27±0.61 | <b>0.05</b> | 0.01 0.33 | 0.072          | < <b>0.001</b> |  |
| VEGFR-2          | 0.44±1.64    | 0.02   | 0.00 0.09  | 0.60±0.70   | 0.38   | 0.12 0.98 | 0.81±1.28 | <b>0.22</b> | 0.17 1.13 | < <b>0.001</b> | 0.917          |  |
| CD11c            | 0.15±0.40    | 0.04   | 0.00 0.12  | 0.79±1.02   | 0.24   | 0.05 1.53 | 0.18±0.30 | <b>0.05</b> | 0.01 0.26 | < <b>0.001</b> | < <b>0.001</b> |  |

*p* values were obtained from Wilcoxon's signed rank test

The bold values indicates significance at *p*<0.05
