# Supplementary material for: Multi-perspective comparison of the immune microenvironment of primary colorectal cancer and liver metastases
Source: Springer Nature journal article supplement (doi:10.1186/s12967-022-03667-2), 2022-10-04
Supplement: MOESM6 [file 23570010]

**Additional file 6: Table S3** Comparison of primary tumors and liver metastases in different regions

|                             | Primary tumor |        |            | Liver metastases |        |            | <i>p</i> value    |
|-----------------------------|---------------|--------|------------|------------------|--------|------------|-------------------|
|                             | Mean±SD       | Median | 25%, 75%   | Mean±SD          | Median | 25%, 75%   |                   |
| <b>Tumor center</b>         |               |        |            |                  |        |            |                   |
| CD8                         | 0.25±0.38     | 0.09   | 0.03 0.31  | 0.67±0.97        | 0.27   | 0.05 1.01  | <b>0.020</b>      |
| CD68                        | 2.29±1.83     | 1.87   | 0.86 3.31  | 2.77±2.49        | 1.80   | 1.13 3.78  | 0.554             |
| PD-L1                       | 1.05±1.38     | 0.58   | 0.20 1.35  | 1.62±1.56        | 1.06   | 0.37 2.77  | <b>0.037</b>      |
| Ki67                        | 4.37±5.05     | 2.04   | 0.62 6.59  | 11.05±14.80      | 2.02   | 0.08 19.70 | 0.520             |
| Foxp3                       | 0.32±0.71     | 0.04   | 0.01 0.22  | 0.39±0.57        | 0.17   | 0.03 0.49  | 0.134             |
| CD163                       | 0.56±0.69     | 0.32   | 0.10 0.70  | 1.25±1.80        | 0.65   | 0.31 1.45  | <b>0.005</b>      |
| INF-γ                       | 0.07±0.13     | 0.01   | 0.00 0.10  | 0.48±0.92        | 0.02   | 0.00 0.64  | 0.120             |
| CD20                        | 0.07±0.14     | 0.01   | 0.00 0.10  | 0.22±1.21        | 0.00   | 0.00 0.06  | 0.188             |
| CD66b                       | 6.83±5.34     | 6.00   | 1.75 11.11 | 3.93±2.94        | 3.76   | 1.74 5.77  | <b>0.009</b>      |
| CD56                        | 2.91±2.61     | 2.50   | 0.83 4.15  | 1.40±1.85        | 0.67   | 0.03 2.02  | <b>&lt; 0.001</b> |
| VEGFR-2                     | 0.08±0.13     | 0.04   | 0.00 0.09  | 0.44±1.64        | 0.02   | 0.00 0.09  | 0.517             |
| CD11c                       | 0.05±0.11     | 0.00   | 0.00 0.07  | 0.15±0.40        | 0.04   | 0.00 0.12  | <b>0.010</b>      |
| <b>Tumor invasive front</b> |               |        |            |                  |        |            |                   |
| CD8                         | 1.36±1.95     | 0.81   | 0.34 1.53  | 1.47±1.67        | 0.87   | 0.38 1.84  | 0.475             |
| CD68                        | 6.74±4.39     | 6.06   | 2.92 8.73  | 5.43±4.40        | 4.07   | 2.52 7.88  | 0.054             |
| PD-L1                       | 3.01±2.88     | 2.22   | 0.91 3.90  | 3.04±3.34        | 1.82   | 0.82 4.59  | 0.658             |
| Ki67                        | 0.57±0.71     | 0.29   | 0.07 0.90  | 1.99±5.82        | 0.36   | 0.07 1.86  | 0.147             |
| Foxp3                       | 0.51±0.75     | 0.25   | 0.10 0.58  | 0.86±0.87        | 0.53   | 0.12 1.46  | <b>0.009</b>      |
| CD163                       | 3.38±2.01     | 2.94   | 2.08 4.40  | 4.70±4.31        | 3.24   | 1.84 5.72  | 0.298             |
| INF-γ                       | 0.25±0.59     | 0.00   | 0.00 0.06  | 0.22±0.43        | 0.05   | 0.02 0.30  | <b>0.008</b>      |
| CD20                        | 0.69±0.93     | 0.33   | 0.07 0.75  | 0.56±1.07        | 0.18   | 0.04 0.74  | 0.170             |
| CD66b                       | 1.60±1.88     | 1.00   | 0.24 2.10  | 1.41±2.21        | 0.65   | 0.35 1.72  | 0.594             |
| CD56                        | 1.00±1.28     | 0.44   | 0.17 1.32  | 0.52±0.70        | 0.30   | 0.16 0.69  | 0.064             |
| VEGFR-2                     | 0.54±0.58     | 0.33   | 0.11 0.74  | 0.60±0.70        | 0.38   | 0.12 0.98  | 0.930             |
| CD11c                       | 0.32±0.34     | 0.23   | 0.05 0.44  | 0.79±1.02        | 0.24   | 0.05 1.53  | 0.206             |
| <b>Peritumor</b>            |               |        |            |                  |        |            |                   |
| CD8                         | 0.19±0.31     | 0.06   | 0.02 0.26  | 0.47±0.42        | 0.44   | 0.08 0.60  | <b>&lt; 0.001</b> |
| CD68                        | 2.17±1.88     | 1.66   | 0.82 3.09  | 2.87±2.22        | 2.32   | 1.32 4.94  | 0.103             |
| PD-L1                       | 0.76±0.93     | 0.36   | 0.05 1.19  | 2.76±2.36        | 2.20   | 1.16 5.10  | <b>&lt; 0.001</b> |
| Ki67                        | 0.08±0.19     | 0.01   | 0.00 0.06  | 1.44±6.89        | 0.13   | 0.04 0.45  | <b>&lt; 0.001</b> |
| Foxp3                       | 0.15±0.21     | 0.06   | 0.02 0.18  | 1.03±1.28        | 0.40   | 0.14 1.73  | <b>&lt; 0.001</b> |
| CD163                       | 1.82±1.46     | 1.63   | 0.49 2.81  | 6.02±3.49        | 6.29   | 2.99 8.02  | <b>&lt; 0.001</b> |
| INF-γ                       | 0.04±0.13     | 0.00   | 0.00 0.00  | 0.40±0.84        | 0.03   | 0.00 0.44  | <b>&lt; 0.001</b> |
| CD20                        | 0.29±0.47     | 0.12   | 0.02 0.26  | 0.61±0.98        | 0.26   | 0.08 0.80  | <b>0.011</b>      |
| CD66b                       | 0.10±1.76     | 0.10   | 0.03 1.11  | 0.25±0.34        | 0.11   | 0.07 0.36  | 0.661             |
| CD56                        | 0.32±0.91     | 0.06   | 0.00 0.23  | 0.27±0.61        | 0.05   | 0.01 0.33  | 0.469             |
| VEGFR-2                     | 0.15±0.28     | 0.04   | 0.00 0.22  | 0.81±1.28        | 0.22   | 0.17 1.13  | <b>&lt; 0.001</b> |
| CD11c                       | 0.15±0.26     | 0.01   | 0.00 0.14  | 0.18±0.30        | 0.05   | 0.01 0.26  | <b>0.022</b>      |

*p* values were obtained from Wilcoxon's signed rank test

The bold values indicates significance at  $p < 0.05$
