# Supplementary material for: Multi-perspective comparison of the immune microenvironment of primary colorectal cancer and liver metastases
Source: Springer Nature journal article supplement (doi:10.1186/s12967-022-03667-2), 2022-10-04
Supplement: MOESM7 [file 23570010]

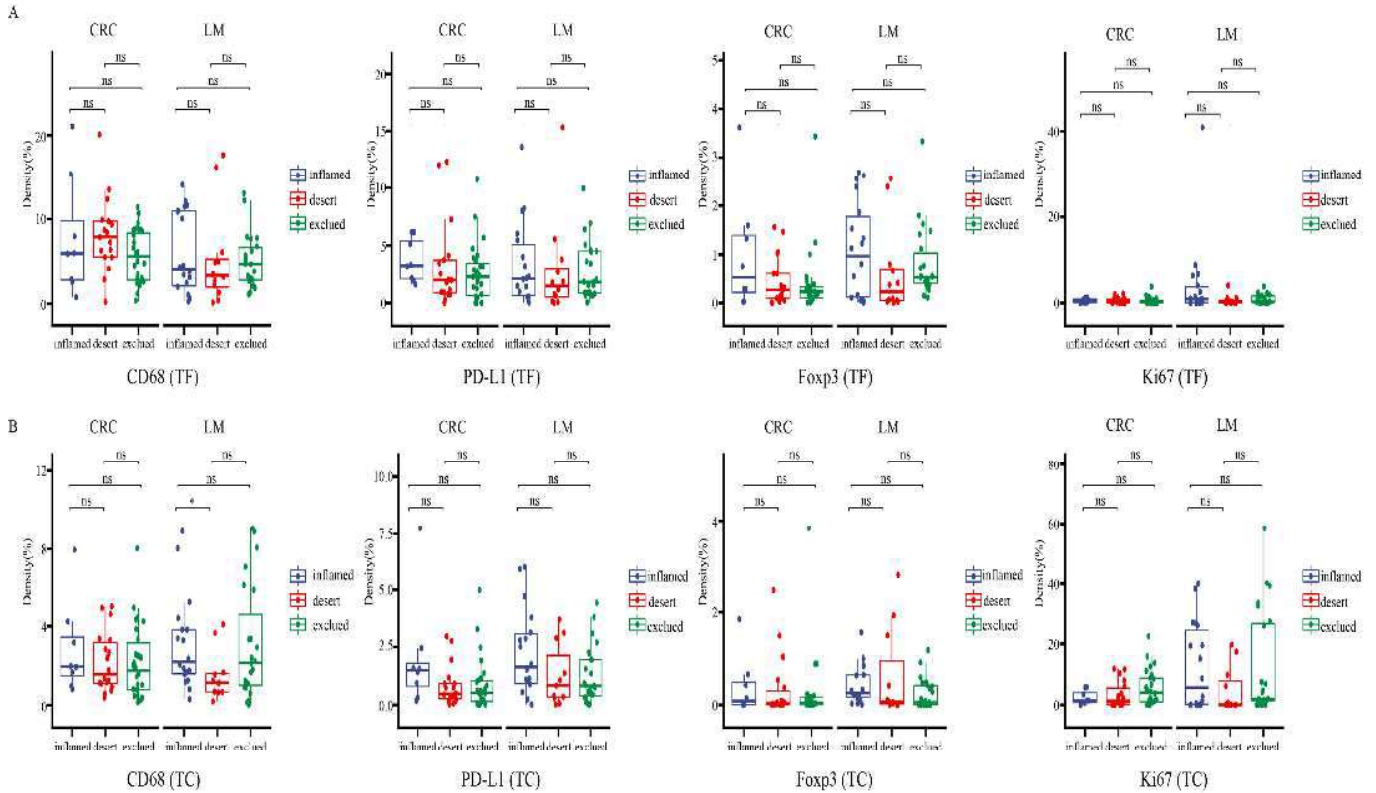

**Additional file 7: Figure S4** Comparison of the three immunotypes according to the degree of CD8 infiltration. A: Comparison of the three immunotypes at the front of the tumor (CD68, Foxp3, PD-L1 and Ki67). C: Comparison of the three immunotypes at the center of the tumor (CD68, Foxp3, PD-L1 and Ki67). (\* $p < 0.05$ ,  $p \geq 0.05$ , not significant)
